# Supplementary material for: Genetic risk factors for COVID-19 and influenza are largely distinct
Source: PubMed Central journal article supplement (PMC11319199; doi:10.1038/s41588-024-01844-1), 2024-08-05

a.

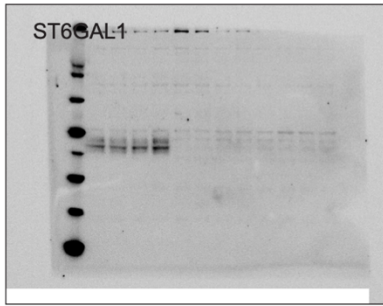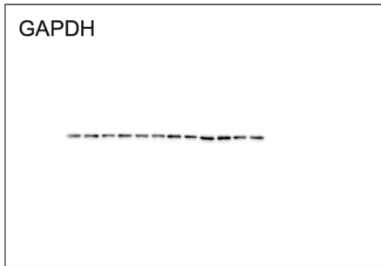

b.

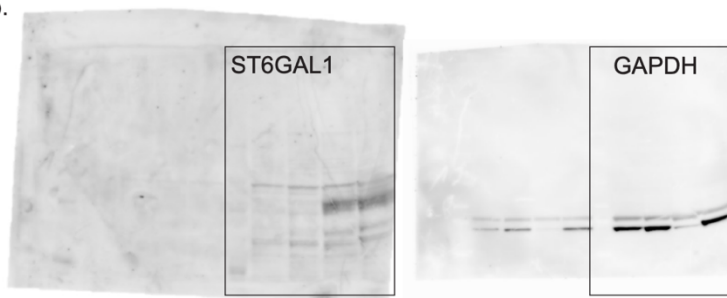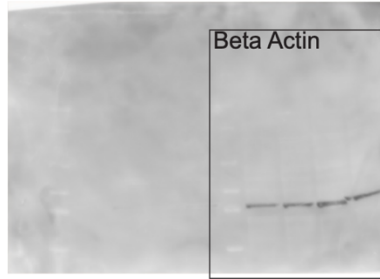

Supplement: 41588_2024_1844_MOESM5_ESM.pdf [file 41588_2024_1844_MOESM5_ESM.pdf]
